# Supplementary material
Source: publisher site journal article supplement (https://www.dovepress.com/article/456933)
Supplement: Supplementary file 1 [file get_supplementary_file.php]

**Appendices**

**Appendix 1** the Contents of Questionnaire

| Parts | Content | Questions | |
| --- | --- | --- | --- |
| Basic information of the research participants |  | Q1 | Sex |
| Q2 | Age (years) |
| Q3 | Educational level |
| Q4 | Occupation |
| Q5 | Annual Income (10k Yuan) |
| Q6 | Number of clinical trials previously participated in (including current) |
| Understanding of and willingness to participate in clinical trials | Comprehension of fundamental concepts | Q7 | Do you know what is a "clinical trial?" |
| Q8 | Do you clearly understand the specific meaning of "clinical trial participants?" |
| Intent to participate in clinical trials | Q9 | Are you willing to participate in clinical trials? |
| Q10-Q12 | What factors contribute to your willingness/some hesitation/unwillingness to participate in clinical trials? |
| Perceived benefits from participation | Q13 | What benefits have you gained through participating in a clinical trial? |
| Trust in the efficacy of clinical trials | Q14 | Do you have high confident in the therapeutic effects of experimental drugs? |
| Satisfaction with participation in clinical trials | Clinical Trial Environment | Q15 | Are you satisfied with the medical environment during your participation in the clinical trial? |
| Clinical Trial Staff and related personnel | Q16 | Your evaluation of the research physicians. |
| Q17 | Your evaluation of the Clinical Research Coordinators (CRCs, responsible for assisting researchers in recruiting and screening trial participants, obtaining informed consent forms, arranging participant visits, scheduling laboratory tests, obtaining test results, and other tasks). |
| Q18 | Your evaluation of the research nurses. |
| Q19 | Your evaluation of the drug management personnel (responsible for drug distribution and recovery). |
| Clinical Trial Process | Q20 | Your evaluation of the informed consent process (such as researchers explaining the specific content and procedures of the trial, the benefits and risks of participating, your rights and responsibilities, effective contact information, and answering your questions about the trial). |
| Q21 | Are you satisfied with the scheduling of trial appointments? |
| Q22 | Are you satisfied with the design and usage of the forms (such as diary cards or measurement scales)? |
| Q23 | Are you satisfied with the packaging and methods of using the trial drugs? |
| Q24 | During the trial process, if you experienced any discomfort or abnormal laboratory test outcomes, were you satisfied with the researchers' response and handling of the situation? |
| Q25 | Are you satisfied with the financial procedures regarding the expenses associated with the clinical trial? |
| Medical Outcomes and Benefits | Q26 | In your opinion, did you gain more benefits or suffer more losses from the clinical trial? |
| Q27 | Are you satisfied with the medical outcomes? |
| Addressing participants’ needs during the trial | Q28 | Regarding any questions and concerns you had during the trial process, were you satisfied with the researchers' response and handling of the situation? |
| Q29 | Do you understand that you have the right to say "no" at any stage of the trial, and that your decision will not affect how the researchers view you? |
| Q30 | If you have any concerns related to the researchers or clinical study, do you know which department to contact? |
| Q31 | What other needs have not been met? |
| Recommendations | Q32 | In your opinion, which aspects could be improved to enhance the satisfaction of clinical trial participants? |
